# Supplementary material
Source: PubMed Central journal article supplement (PMC2683091)
Supplement: 0900343106_0900343106SI.pdf [file 0900343106_0900343106SI.pdf]

# Supporting Information

Chen et al. 10.1073/pnas.0900343106

## SI Methods

**Construction of Targeting Vector.** We screened the CITB mouse BAC library (Invitrogen) with *Hras* gene-specific primers to obtain a BAC containing the entire mouse *Hras* gene. We then used recombinering (1) to introduce a DNA fragment containing the entire *Hras* gene and 2.3 kb upstream of *Hras* exon 0 (5' arm) or a fragment consisting of the entire *Hras* gene and 2.5 kb downstream of *Hras* exon 4 (3' arm) into pBSISK+ or pBSI-IKS+ (Stratagene), respectively. To complete the 5' arm of the targeting construct, a *loxP* site was introduced upstream of exon 1, and a SV40 poly(A)/translation stop signal was placed 3' of *Hras* exon 4. To complete the 3' targeting arm, we used site-directed mutagenesis to change the nucleotide sequence at codon 12 to valine, and replaced exon 0 with a *Frt*-flanked *Neo* cassette with a 3' *loxP* site added upstream of exon 1. The final targeting construct was generated by ligating the 5' and 3' arms, and was  $\approx 11.8$  kb in size (see Fig. 1).

**Development of *FR-Hras*<sup>G12V</sup> Mice.** The targeting construct was transfected into 2 different 129SvEv (129S6) ES cell lines. Neo-resistant colonies were isolated and screened by PCR using a primer pair spanning the *Neo* gene and a site located just outside the 3' targeting arm (primer sequences available on request). Appropriate integration was confirmed by Southern blotting. We then designed PCR primers to sequence all exons of both tandem *Hras* gene cassettes, including the exon 1 with the G12V mutation, the 5', and 3' *loxP* and *Frt* sites, respectively. One clone (D14) was found to have appropriate targeting of *Hras* and another (D61) was also properly targeted, but had a second integration site. These were then injected into D2B6F1 X B6 (Jackson Labs) blastocysts to produce chimeric mice. The chimeras were then bred to Swiss-Black (Taconic) females. The birth of agouti colored mice indicated germline transmission of ES cell-derived gametes. The agouti pups were genotyped to determine those that carried the targeted allele, resulting in 6 and 18 mice from clones D14 and D61, respectively. The founders were crossed with WT Swiss-Black mice and resulting pups were screened for *Hras* targeting. Founders from both lines had targeted offspring. An attempt to breed out the second integration site in D61 lines was not successful, and this line was therefore not further pursued. We reconfirmed the appropriate targeting and sequence integrity of the targeted allele in F1 pups from line D14, as described above. To remove the *Neo* cassette, *FR-Hras*<sup>G12V</sup>-*Neo* mice were crossed with  $\beta$ -*actin*-*Flp* mice. The resulting double transgenic offspring were crossed with WT littermates. Offspring containing the *FR-Hras*<sup>G12V</sup> allele without the *Neo* cassette and that were negative for  $\beta$ -*actin*-*Flp* were mated with WT littermates and the line expanded. We used advance intercross breeding to minimize drift in the genetic background.

**Clinical and Anatomical Pathology.** All mouse experiments were approved by the Institutional Animal Care and Utilization Committees of the University of Cincinnati and Memorial Sloan-Kettering Cancer Center. Mice were killed by CO<sub>2</sub> asphyxiation. Whole blood was collected postmortem by cardiac puncture, and complete blood counts and white blood-cell differentials were performed on EDTA anticoagulated whole blood. Aliquots of serum were submitted to a commercial reference laboratory (ALX Laboratory at Animal Medical Center, New York, NY) for determination of biochemical parameters. Body and select organ weights were obtained.

Complete postmortem evaluations were performed on all mice. All tissues were fixed in 4% paraformaldehyde or 10% neutral buffered formalin for 24 h and then transferred to 70% ethanol, with the exception of the skull, vertebral column, and rear leg, which were fixed in Decalcifier I (Surgipath Medical Industries, Inc.) for 72 h. All tissues were processed by routine methods and embedded in paraffin wax. Sections (5  $\mu$ m) were stained with H&E, and evaluated with an Olympus BX45 light microscope (New York/New Jersey Scientific, Inc.).

**IHC Staining of Mouse Tissues.** Tissues were promptly excised after killing, and either placed in a 4% PFA solution overnight at 4 °C and embedded in paraffin or immediately frozen with dry ice for frozen sectioning. Next, 5- $\mu$ m paraffin sections were immunostained with antibodies to *p*-AKT (AF887, R&D Systems), Ki67 (VP-K451, Vector Laboratories), pERK (4376) and phospho ribosomal S6 kinase (2211L) from Cell Signaling, p53 (SC-6243),  $\gamma$ H2AX (07-164, Upstate), and Dcr2 (AAP-371, Assay Designs, Inc.) with the help of the Memorial Sloan Kettering Cancer Center Molecular Cytology Core Facility. Staining for SA- $\beta$ gal was performed using Biovision's senescence detection kit according to manufacturer's instruction (Biovision).

**Laser-Capture Microdissection.** Mouse stomach was promptly excised after killing and immediately frozen with liquid N<sub>2</sub>. Frozen sections (8  $\mu$ m) were used to microdissect forestomach and glandular stomach epithelial cells by laser capture using an Arcturus microdissection system. RNA was extracted using a Picopure RNA Isolation Kit (Molecular Devices). Ras isoform, progastriecin, and keratin 5 mRNA levels were analyzed by real-time RT-PCR, standardized to GAPDH. Primers are available upon request.

**MicroCT Imaging.** For imaging, animals were anesthetized by continuous inhalation of a mixture of 1.5% isoflurane in air at a flow rate of 1 to 2 L/min and placed supine on the scanner couch. Ungated whole-body CT images were acquired without contrast using a dedicated small-animal CT scanner (MicroCAT-IITM, ImTek). The X-ray tube voltage was fixed at 55 kVp and the current at 800  $\mu$ A. A 360°-acquisition was performed over  $\approx 12$  min in 1° steps; each projection image was  $\approx 1$  sec in duration. The resulting projection-image data were reconstructed in real-time using the manufacturer-provided Feldkamp conebeam algorithm in a 192  $\times$  192  $\times$  384 3-dimensional image matrix (reconstructed voxel dimensions: 0.228  $\times$  0.228  $\times$  0.228 mm). The reconstructed images were then imported into ASiPro (Siemens Preclinical Solutions) for display and analysis.

**Isolation of MEFs.** MEFs were isolated from E13.5-day embryos as described (2). The fetal heads were used for genotyping. Cells were grown to confluence and split once before freezing, and labeled as passage 1. To determine cumulative cell counts after serial passaging, MEFs (10<sup>6</sup>) of the indicated genotypes from passage 3 onwards were plated on 10-cm dishes, grown in 10% FCS for 3 days, trypsinized, counted, and replated at 10<sup>6</sup> cells per well. This was repeated for each passage. The cumulative cell number was calculated based on the formula  $T^n = T^{n-1} \times P^n / 10^6$ , where  $T$  = cumulative cell number;  $n$  = passage number;  $P$  = cell number of current passage after 3 days in culture. For short-term growth curves, MEFs at passages 3 and 15 were plated at  $5 \times 10^4$ , grown in 2% FCS, and counted every other day for 7 days.





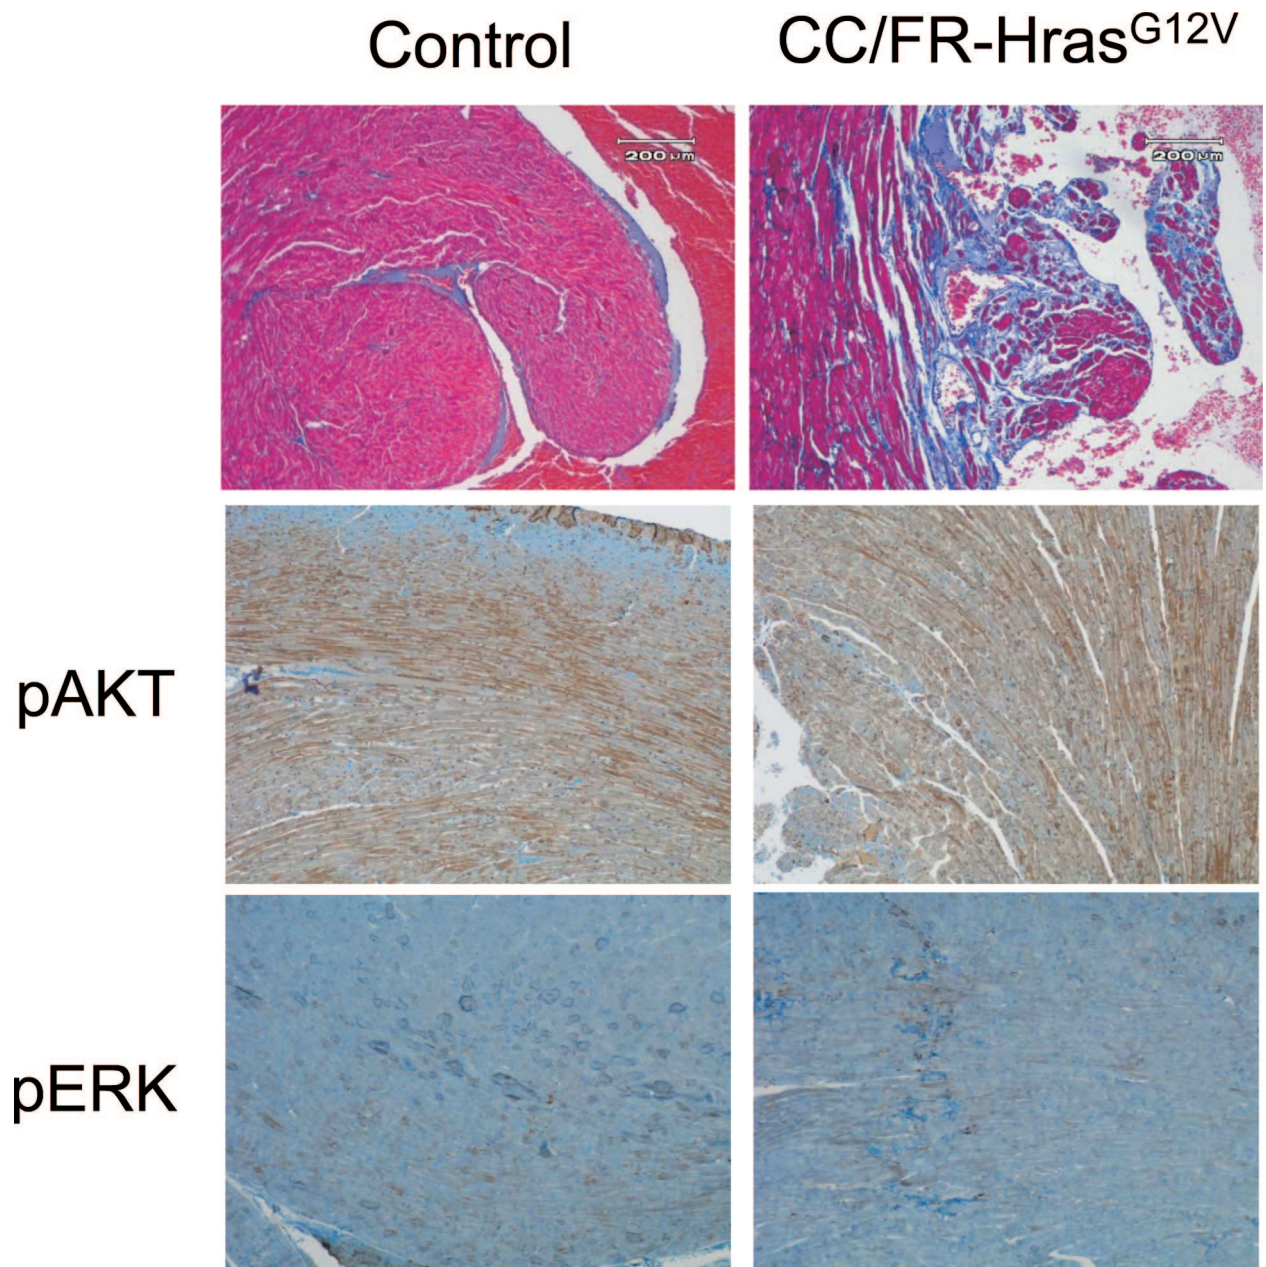

**Fig. S2.** *CC/FR-Hras<sup>G12V</sup>* mice develop myocardial fibrosis. (Top) Trichrome staining (50 $\times$ ) of hearts from  $\approx$ 52-week-old *CC/FR-Hras<sup>G12V</sup>* and control mice. Myocardial fibrosis was found in 5 out of 6 *CC/FR-Hras<sup>G12V</sup>* mice, but not in age-matched control mice (0 out of 6). Immunohistochemistry (IHC) of heart sections (50 $\times$ ) from 52-week-old *CC/FR-Hras<sup>G12V</sup>* or control mice for pAKT (Middle) or pERK (Bottom). No clear difference in pAKT or pERK immunostaining was noted, consistent with the results from Western blotting shown in Fig. S1.
